# Supplementary material
Source: PubMed Central journal article supplement (PMC6283522)
Supplement: tpmd171015.SD1.pdf [file tpmd171015.SD1.pdf]

**Appendix 1: Age distribution of the study population**

**Table 7: Age distribution of the study population**

| Age category | Total     | RM        | LTR       |
|--------------|-----------|-----------|-----------|
|              | n (%)     | n (%)     | n (%)     |
| <0 - 5]      | 7 (1.4)   | 0 (0.0)   | 7 (1.6)   |
| <5 - 10]     | 22 (4.4)  | 3 (5.6)   | 19 (4.2)  |
| <10 - 15]    | 31 (6.1)  | 2 (3.7)   | 29 (6.4)  |
| <15 - 20]    | 58 (11.5) | 9 (16.7)  | 49 (10.9) |
| <20 - 25]    | 65 (12.9) | 9 (16.7)  | 56 (12.4) |
| <25 - 30]    | 53 (10.5) | 11 (20.4) | 42 (9.3)  |
| <30 - 35]    | 54 (10.7) | 3 (5.6)   | 51 (11.3) |
| <35 - 40]    | 46 (9.1)  | 7 (13.0)  | 39 (8.6)  |
| <40 - 45]    | 43 (8.5)  | 4 (7.4)   | 39 (8.6)  |
| <45 - 50]    | 32 (6.3)  | 1 (1.9)   | 31 (6.9)  |
| <50 - 55]    | 27 (5.3)  | 2 (3.7)   | 25 (5.5)  |
| <55 - 60]    | 22 (4.4)  | 1 (1.9)   | 21 (4.7)  |
| <60 - 65]    | 19 (3.8)  | 0 (0.0)   | 19 (4.2)  |
| > 65         | 26 (5.1)  | 2 (3.7)   | 24 (5.3)  |

## Appendix 2: Indices

### 1. Household knowledge, attitude and practices index (KAPi)

This index was created using information collected using the questions listed in the following table:

| Variable      | Question                                            | Values                                                                                    |
|---------------|-----------------------------------------------------|-------------------------------------------------------------------------------------------|
| Sabedengue    | Have you heard about dengue?                        | Yes<br>No                                                                                 |
| Mosquitotrans | How is dengue transmitted?                          | Do not know<br>Food or water<br>Direct contact<br>Mosquito bite                           |
| Infodengue    | Who informed you about dengue?                      | Friend or family<br>Mass media (radio, TV)<br>Health care personnel<br>Other              |
| Buscoinfo     | Did you look for more information?                  | No<br>Yes<br>Friend or family<br>Health care personnel<br>Internet<br>Other               |
| Limpieza      | How frequently do you clean the household premises? | Once a month<br>Twice a month<br>Once a week<br>Twice a week<br>Thrice a week<br>Daily    |
| Drena         | How do you drain stagnant water in the premises?    | Do not drain<br>Sewer drain, ditches<br>Drain manually                                    |
| Proteccion    | Do you do anything to protect yourself from dengue? | Do not take measures<br>Use repellent<br>Use insecticide<br>Use repellent and insecticide |

The values for each answer were standardized in order to get a maximum of 1 as the highest score for each question. Furthermore, the total sum of the values of each question was divided in order to achieve the same standardization. The weights used were decided upon by the

investigators based on whether the KAP could have more direct impact on dengue control and prevention:

$$KAPi = \left[ \left( \frac{\text{limpieza}}{6} \right) \times 2 + \left( \frac{\text{drena}}{3} \right) \times 2 + \left( \frac{\text{sabedengue}}{2} \right) \times 1 + \left( \frac{\text{infodengue}}{4} \right) \times 1 + \left( \frac{\text{buscoinfo}}{6} \right) \times 3 + \left( \frac{\text{proteccion}}{4} \right) \times 2 + \left( \frac{\text{mosquitotrans}}{3} \right) \times 3 \right] / 14$$

The findings from each of the questions from the administered questionnaire are in Table 8:

| <b>Table 8: Information assessed for household KAPi</b> |              |
|---------------------------------------------------------|--------------|
|                                                         | <b>n (%)</b> |
| Have you heard about dengue?                            |              |
| Yes                                                     | 299 (97.4)   |
| No                                                      | 8 (2.6)      |
| How is dengue transmitted?                              |              |
| Do not know                                             | 9 (2.9)      |
| Food / water                                            | 2 (0.7)      |
| Direct contact                                          | 0 (0)        |
| Mosquito bite                                           | 296 (96.4)   |
| Who gave you information about dengue?                  |              |
| Other                                                   | 10 (3.3)     |
| Friend or family                                        | 30 (9.8)     |
| Mass media (radio, TV)                                  | 41 (13.4)    |
| Health care personnel                                   | 226 (73.6)   |
| Did you seek more information?                          |              |
| No                                                      | 187 (60.9)   |
| Yes                                                     | 120 (39.1)   |
| Other                                                   | 5 (4.2)      |
| Internet                                                | 12 (10.0)    |
| Friend or family                                        | 6 (5.0)      |
| Health care personnel                                   | 97 (80.8)    |
| How do you drain stagnant water?                        |              |
| Do not drain                                            | 77 (25.1)    |
| Sewer drain / ditch                                     | 169 (55.0)   |
| Manually                                                | 61 (19.9)    |

How frequently do you clean household surroundings?

|                                   |            |
|-----------------------------------|------------|
| Once or twice a month             | 107 (34.9) |
| Once a week or more but not daily | 128 (41.7) |
| Daily                             | 72 (23.5)  |

What do you do to protect yourself from mosquito bites?

|                               |            |
|-------------------------------|------------|
| Nothing                       | 134 (43.6) |
| Use repellent                 | 10 (3.3)   |
| Use insecticide               | 160 (52.1) |
| Use repellent and insecticide | 3 (1.0)    |

---

## 2. Household physical infrastructure and services index (ISi)

A similar approach as for KAPi was used for the ISi. The variables conveyed in this index are:

| Variable     | Question                                                 | Values                                                  |
|--------------|----------------------------------------------------------|---------------------------------------------------------|
| Matpared     | Wall building material                                   | Other<br>Wood<br>Bricks / cement                        |
| Piso         | Flooring material                                        | Dirt/sand/clay<br>Wood<br>Cement / bricks<br>Tiles      |
| Techo        | Roof material                                            | Plastic tarp or other<br>Tin roof<br>Concrete / cement  |
| Cocinapropia | Do you share a kitchen with other family or business?    | No<br>Yes                                               |
| Banhopropio  | Do you share the bathroom with other family or business? | No<br>Yes                                               |
| Excrementos  | How do you dispose of excreta?                           | Open field<br>Latrine<br>Septic tank<br>Sewer system    |
| Aguacorrente | What is the source of running water for this household?  | Other<br>Plumbing into the house                        |
| Basura       | How do you dispose of garbage?                           | Burn or bury residue<br>Routine pick-up by municipality |

The values from each of the responses were standardized to add up to 1 and then the total sum was divided by 12 for the same purpose. The weights applied to this index were selected according to the relationship with vector breeding risk that has been reported for each of the elements included in the index:

$$CFSi = \left[ \left( \frac{pared}{3} \right) \times 1 + \left( \frac{piso}{4} \right) \times 1 + \left( \frac{techo}{3} \right) \times 1 + \left( \frac{excrementos}{4} \right) \times 2 + \left( \frac{basura}{2} \right) \times 2 + \left( \frac{aguacorrente}{2} \right) \times 3 + \left( \frac{banhopropio}{2} \right) \times 1 + \left( \frac{cocinapropia}{2} \right) \times 1 \right] / 12$$

The responses for the variables are detailed in Table 9 below:

---

**Table 9: Information assessed for household ISI**

---

|                                | n (%)      |
|--------------------------------|------------|
| Flooring material              |            |
| Dirt                           | 46 (15.0)  |
| Wood                           | 5 (1.6)    |
| Cement / brick                 | 253 (82.4) |
| Tiles                          | 3 (1.0)    |
| Wall material                  |            |
| Other                          | 19 (6.2)   |
| Wood                           | 147 (47.9) |
| Bricks/cement                  | 141 (45.9) |
| Roof material                  |            |
| Plastic tarp                   | 12 (3.9)   |
| Tin roof                       | 280 (91.2) |
| Concrete                       | 15 (4.9)   |
| Shared kitchen                 |            |
| Yes                            | 30 (9.8)   |
| No                             | 277 (90.2) |
| Shared bathroom                |            |
| Yes                            | 40 (13.0)  |
| No                             | 267 (87.0) |
| Removal of excreta             |            |
| Open field                     | 6 (2.0)    |
| Latrine                        | 57 (18.6)  |
| Septic tank                    | 117 (38.1) |
| Sewer system                   | 127 (41.4) |
| Water source                   |            |
| Other                          | 17 (5.5)   |
| Piped service inside the house | 290 (94.5) |
| Garbage disposal               |            |
| Burn or bury                   | 20 (6.5)   |
| Routine pick-up                | 287 (93.5) |

---

### 3. Household assets indices (Ai)

To create this index we used weights obtained from market value in US \$ and the amount of each of the items listed below:

| Variable      | Question                       | Values    |
|---------------|--------------------------------|-----------|
| Q01_1         | Have you got a radio?          | No<br>Yes |
| Q01_1_CUANTOS | How many?                      | Number    |
| Q01_2         | Have you got a TV set?         | No<br>Yes |
| Q01_2_CUANTOS | How many?                      | Number    |
| Q01_3         | Have you got a mobile phone?   | No<br>Yes |
| Q01_3_CUANTOS | How many?                      | Number    |
| Q01_4         | Have you got a sewing machine? | No<br>Yes |
| Q01_4_CUANTOS | How many?                      | Number    |
| Q01_5         | Have you got a refrigerator?   | No<br>Yes |
| Q01_5_CUANTOS | How many?                      | Number    |
| Q01_6         | Have you got a bicycle?        | No<br>Yes |
| Q01_6_CUANTOS | How many?                      | Number    |
| Q01_7         | Have you got a motorcycle?     | No<br>Yes |
| Q01_7_CUANTOS | How many?                      | Number    |
| Q01_8         | Have you got a car?            | No<br>Yes |
| Q01_8_CUANTOS | How many?                      | Number    |
| Q01_9         | Have you got a canoe?          | No<br>Yes |
| Q01_9_CUANTOS | How many?                      | Number    |

With this information, we took the natural logarithm of the number obtained. Therefore,  $A_i$  was calculated as follows:

$$A_i = \ln ( Q01_1 \times Q01_{1_{CUANTOS}} \times 46 + Q01_2 \times Q01_{2_{CUANTOS}} \times 124 + Q01_3 \times Q01_{3_{CUANTOS}} \times 50 \\ + Q01_4 \times Q01_{4_{CUANTOS}} \times 183 + Q01_5 \times Q01_{5_{CUANTOS}} \times 312 + Q01_6 \times Q01_{6_{CUANTOS}} \times 82 \\ + Q01_7 \times Q01_{7_{CUANTOS}} \times 1504 + Q01_8 \times Q01_{8_{CUANTOS}} \times 10160 + Q01_9 \times Q01_{9_{CUANTOS}} \times 100)$$

The responses for the variables included in this index are presented in Table 10:

| <b>Table 10: Information assessed for household <math>A_i</math></b> |              |
|----------------------------------------------------------------------|--------------|
|                                                                      | <b>n (%)</b> |
| The household has got:                                               |              |
| Radio                                                                | 272 (88.6)   |
| TV set                                                               | 294 (95.8)   |
| Mobile phone                                                         | 295 (96.1)   |
| Sewing machine                                                       | 28 (9.1)     |
| Refrigerator                                                         | 232 (75.6)   |
| Bicycle                                                              | 87 (28.3)    |
| Motorcycle                                                           | 219 (71.3)   |
| Car                                                                  | 17 (5.5)     |
| Canoe                                                                | 11 (3.6)     |



### **Appendix 3: Maps of hot spots, cold spots and migration**

1. **Figure 6:** Hot spots for migrant members, KAPi, income and positive households
2. **Figure 7:** Cold spots for ISi using Getis-Ord  $G_i^*$  and expansion areas in the city

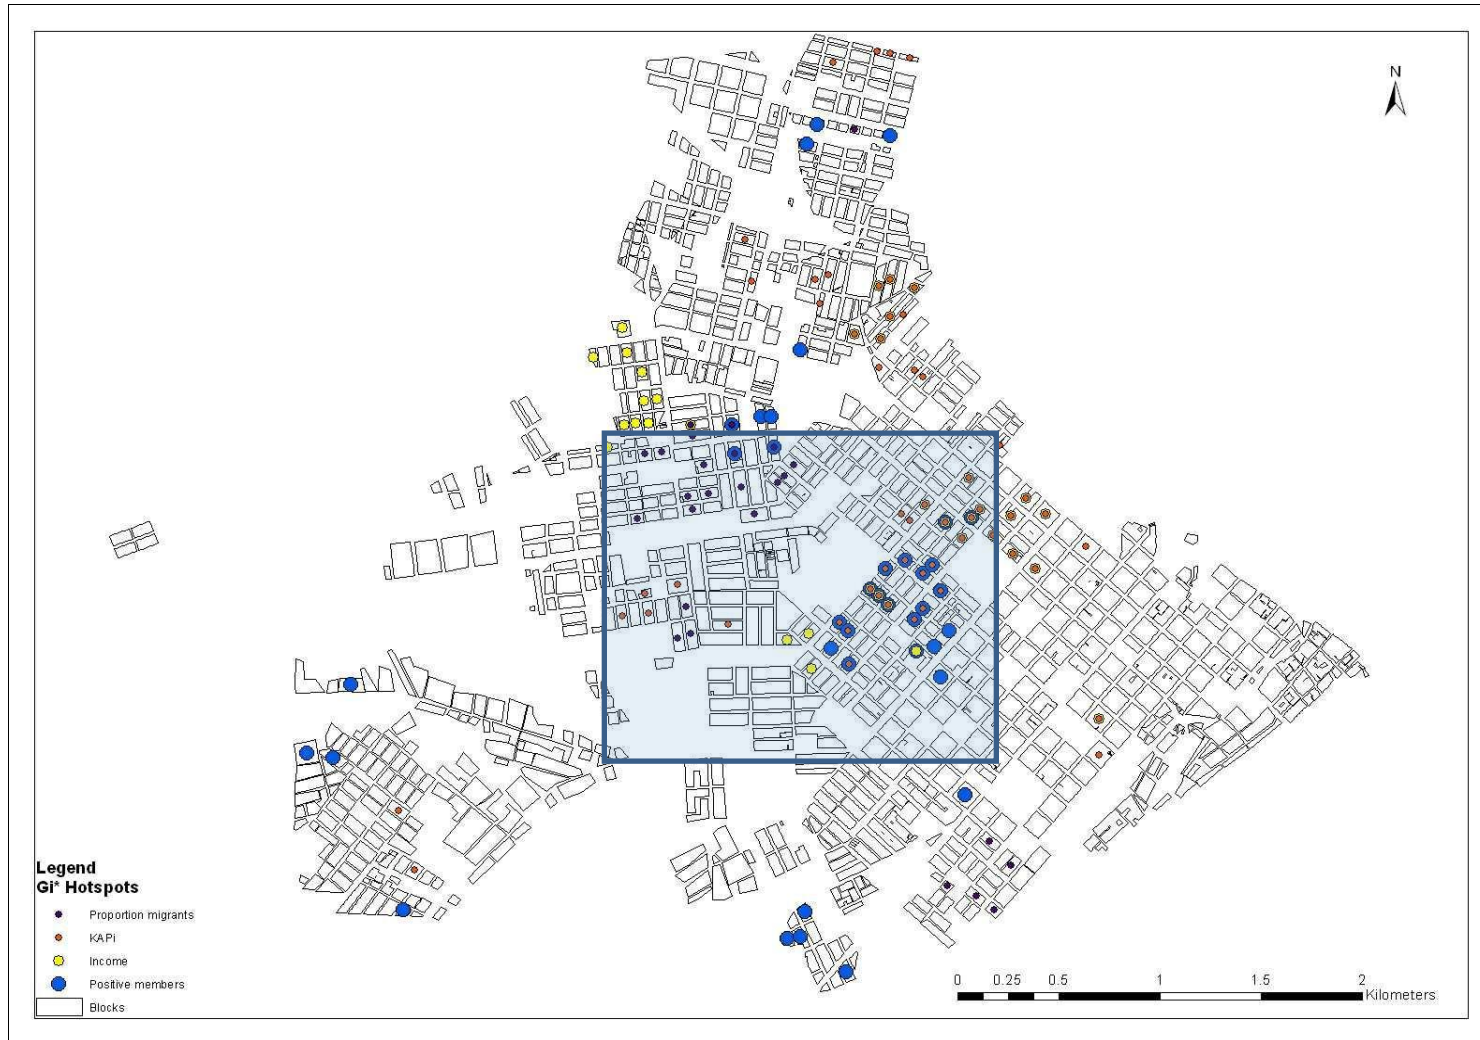

**Figure 6: Hot spots for migrant members, KAPi, income and positive households**

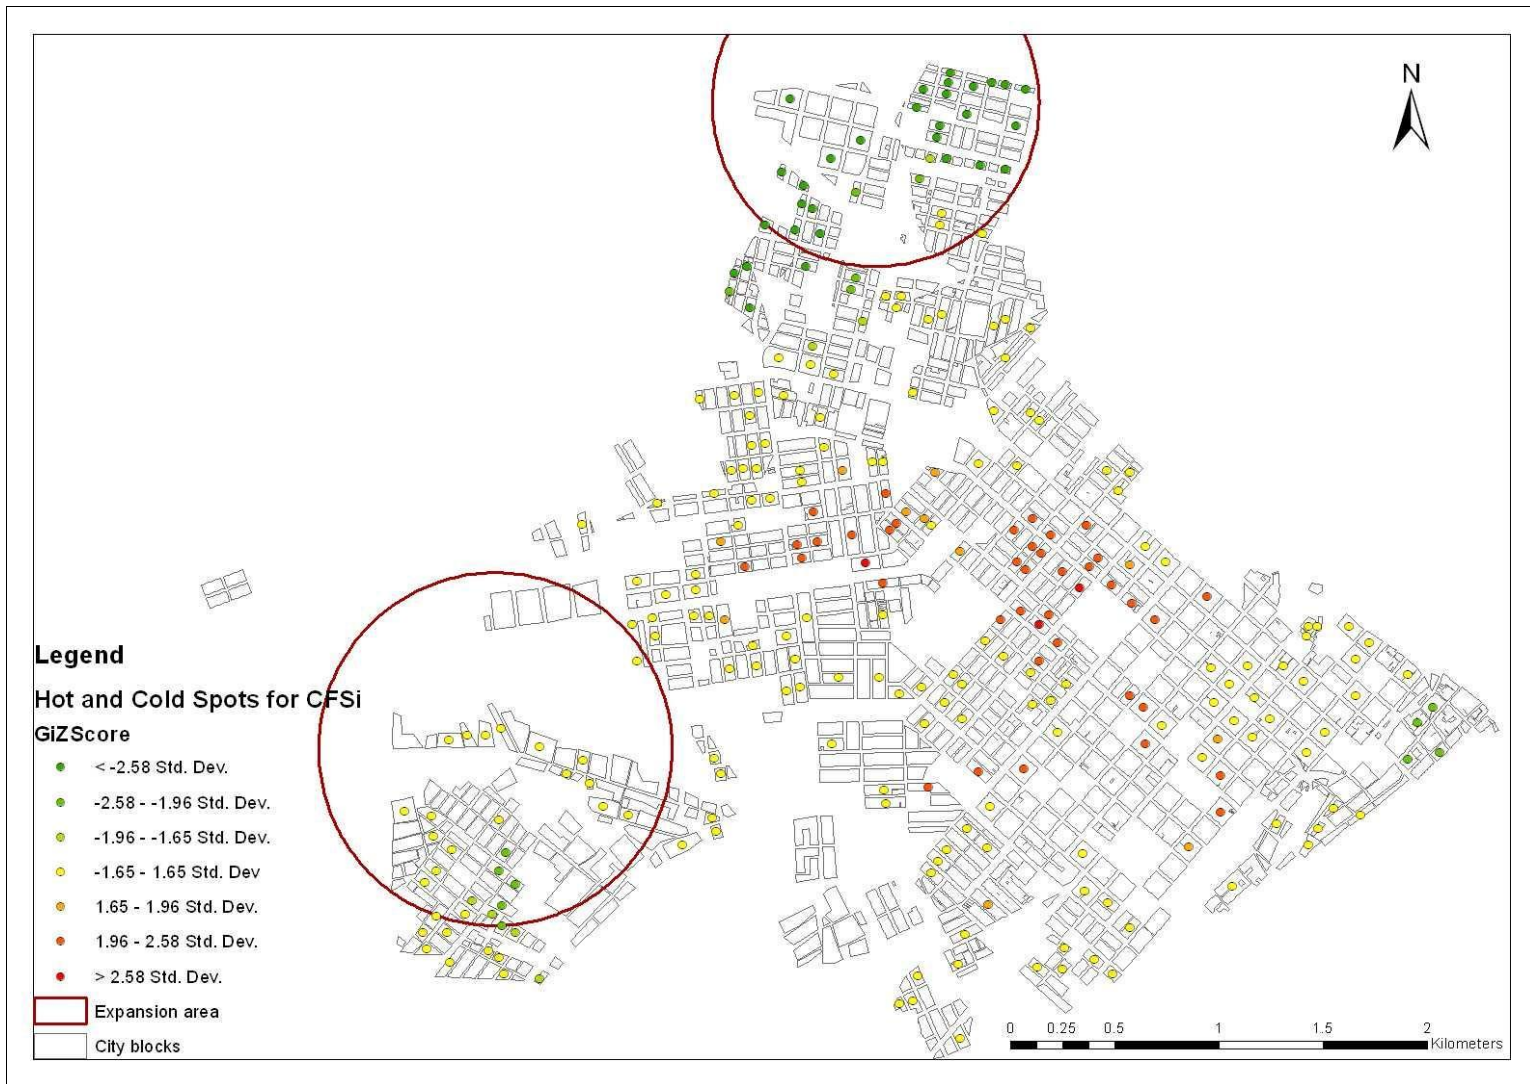

**Figure 7: Cold spots for ISI using Getis-Ord  $G_i^*$  and expansion areas in the city**
